# Supplementary material for: Enhancement of the ionic conductivity of a composite polymer electrolyte via surface functionalization of SSZ-13 zeolite for all-solid-state Li-metal batteries
Source: Royal Society of Chemistry journal article supplement (doi:10.1039/d0ta11218f), 2020-12-28
Supplement: d0ta11218f1.pdf [file d0ta11218f1.pdf]

Supporting Information for

**Enhancement of ionic conductivity of a composite polymer electrolyte via surface functionalization of SSZ-13 zeolite for all-solid-state Li-ion batteries**

Hasan Jamal<sup>a</sup>, Firoz Khan<sup>b</sup>, Suyeon Hyun<sup>a</sup>, Sang Won Min<sup>a</sup> and Jae Hyun Kim<sup>a</sup>

<sup>a</sup>Division of Energy Technology, Daegu Gyeongbuk Institute of Science & Technology, 333, Techno Jungang-Daero, Hyeonpung-Myeon, Dalseong-Gun, Daegu 42988,

Republic of Korea

<sup>b</sup>Center of Research Excellence in Renewable Energy (CORE-RE), King Fahd University of Petroleum & Minerals (KFUPM), Dhahran 31261, Saudi Arabia

\*Correspondence: jaehyun@dgist.ac.kr; Tel.: +82-53-7853-610; Fax: +82-53-7853-439

## **Synthesis of LFP and NCA cathodes**

The charge-discharge measurements of CPEs were conducted using the CR2032 type coin cell structure. The cathode was realized using LFP, while the Li-foil was acted as an anode. The cathode slurry was composed of 90 wt.% LFP powder, 5 wt.% super P, and 5 wt.% polyvinylidene fluoride (PVDF). The constituents of the cathode were dissolved in N-Methyl-2-pyrrolidone (NMP) using high energy ball-milling mixing. Then coated on the Al-foil and dried in vacuum at 110 °C for 12 h. The charge-discharged analysis was done using an instrument (WonATech, WBCS3000) between 2.6 V–4.3 V at a current density of 0.1 C. The specific capacity was calculated through the mass of active material. The current density at 1C = 170 mA/g for the LFP cathode. The area mass loading of the active material was 2.2 mg/cm<sup>2</sup>. A similar cathode fabrication process was used for NCA with the same mass loading. The current density at 1C = 195 mA/g for the NCA cathode.

## **Fabrication of coin cells for charge/discharge measurements**

The coin cells were fabricated using three types of solid electrolytes i.e., SPE, 5% CPE, and 5% MZ-CPE. The Li-foil is used as an anode for all the cells. LFP was used as a cathode for SPE and 5% CPE solid electrolytes, whereas two types of cathodes were used for 5% MZ-CPE solid electrolyte. Thus, the cell structures for SPE and 5% CPE solid electrolytes were [Li|SPE|LFP] and [Li|5% CPE|LFP], respectively. However, the cell structures used for 5% MZ-CPE were [Li|5% MZ-CPE|LFP] and [Li|5% MZ-CPE|NCA].

## **Fabrication of coin cells using liquid electrolyte for charge/discharge measurements**

The coin cell structure used for liquid electrolytes was [Li|Liquid electrolytes|LFP]. 1 M LiPF<sub>6</sub> in a mixture of ethylene carbonate–dimethyl carbonate (EC–DMC) with a volume ratio of 3: 7 was used as the liquid electrolyte (Starlyte, Korea). The Celgard 2400 membrane was used as a separator.

### Degree of crystallinity calculation from DSC data

DSC data for phase transition behavior of the PEO, SPE and MZ-CPE with different content of M-SSZ-13 zeolite including glass transition temperature ( $T_g$ ), Melting temperature ( $T_m$ ), enthalpy of melting ( $\Delta H_m$ ) and degree of crystallinity ( $X_c$ ).

$$x_c \equiv \frac{\Delta H_m}{\Delta H_0} \quad (S1)$$

The degree of crystallinity ( $X_c$ ) can be estimated according to Eq. (S1), where,  $\Delta H_m$  was obtained from DSC results, and  $\Delta H_0$  is the melting enthalpy of 100 % crystalline PEO (213.7 J/g) reported in literature [1,2].

### Activation energy calculation

The Vogel-Tamman-Fulcher (VTF) equation (S2) is used to determine the value of activation energy ( $E_a$ ) of the SPE and MZ-CPEs [3].

$$\sigma = AT^{-1/2} e^{\frac{-E_a}{R(T-T_0)}} \quad (S2)$$

Where, A = pre-exponential factor, T = temperature, R = Universal gas constant (0.008314 kJ/mol/K) and  $T_0$  = equilibrium glass-transition temperature of the copolymer ( $T_g - 50$ ).

The eq. (S2) can be rewritten as

$$\log(\sigma.T^{1/2}) = \log(A) - \frac{E_a}{R(T-T_0)} \quad (S3)$$

The curves between  $\log(\sigma.T^{1/2})$  vs.  $\frac{1}{(T-T_0)}$  were plotted for each sample as shown in Fig. S18.

Furthermore, those curves were linearly fitted. The slope of the curve with the  $\frac{1}{(T - T_0)}$  axis provides the value of  $E_a$ , whereas, the intercept on the  $\log(\sigma \cdot T^{1/2})$  axis gives the value of A. The obtained values of  $E_a$  and  $\log(A)$  are listed in Table S5.

**Table S1.** Composition of SPE, Li-salt, and MZ-SSZ-13 dissolved in ACN (15 mL) for synthesis of MZ-CPE. Ball milling time for all the samples are 48 h.

| Sample names | PEO (g) | LiTFSI (g) | MZ-SSZ-13 (g) |
|--------------|---------|------------|---------------|
| SPE          | 0.40    | 0.102      | NA            |
| 5% MZ-CPE    | 0.40    | 0.102      | 0.0251        |
| 10% MZ-CPE   | 0.40    | 0.102      | 0.0502        |
| 15% MZ-CPE   | 0.40    | 0.102      | 0.0753        |
| 20% MZ-CPE   | 0.40    | 0.102      | 0.1004        |

**Table S2.** Ionic conductivities of, 5% MZ-CPE @30 °C With different ball-milling time.

| <b>Ball-milling duration (h)</b> | <b><math>\sigma</math> (S/cm) at 30 °C</b> |
|----------------------------------|--------------------------------------------|
| 48                               | $6.16 \times 10^{-4}$                      |
| 96                               | $1.40 \times 10^{-4}$                      |
| 144                              | $1.29 \times 10^{-4}$                      |
| 192                              | Very fragile                               |

**Table S3.** DSC data for phase transition behavior of the PEO, SPE and MZ-CPE with different content of M-SSZ-13 zeolite including glass transition temperature ( $T_g$ ), Melting temperature ( $T_m$ ), enthalpy of melting ( $\Delta H_m$ ) and degree of crystallinity ( $X_c$ ).

| Sample names | $T_g$ (°C) | $T_m$ (°C) | $\Delta H_m$ (J/g) | $X_c$ (%) |
|--------------|------------|------------|--------------------|-----------|
| PEO          | NA         | 70.9       | 176.3              | 82.4      |
| SPE          | -33.6      | 63.7       | 69.8               | 32.7      |
| 5% MZ-CPE    | -36.8      | 60.6       | 67.7               | 31.6      |
| 10% MZ-CPE   | -34.2      | 61.8       | 64.9               | 30.4      |
| 15% MZ-CPE   | -34.8      | 60.2       | 54.9               | 25.7      |
| 20% MZ-CPE   | -36.2      | 59.5       | 51.9               | 24.3      |

**Table S4.** Ionic conductivities of SPE, 5% MZ-CPE, 10% MZ-CPE, 15% MZ-CPE and 20% MZ-CPE measured at various temperatures (20, 30, 40, 50, 60 and 70 °C).

| Samples    | $\sigma$ (S/cm)       |                       |                       |                       |                       |                       |
|------------|-----------------------|-----------------------|-----------------------|-----------------------|-----------------------|-----------------------|
|            | 20 °C                 | 30 °C                 | 40 °C                 | 50 °C                 | 60 °C                 | 70 °C                 |
| SPE        | $2.29 \times 10^{-6}$ | $1.84 \times 10^{-5}$ | $1.15 \times 10^{-4}$ | $5.24 \times 10^{-4}$ | $1.58 \times 10^{-3}$ | $2.34 \times 10^{-3}$ |
| 5% MZ-CPE  | $8.00 \times 10^{-5}$ | $6.16 \times 10^{-4}$ | $3.44 \times 10^{-3}$ | $1.66 \times 10^{-2}$ | $3.61 \times 10^{-2}$ | $5.34 \times 10^{-2}$ |
| 10% MZ-CPE | $3.76 \times 10^{-5}$ | $2.16 \times 10^{-4}$ | $7.76 \times 10^{-4}$ | $6.16 \times 10^{-3}$ | $6.74 \times 10^{-3}$ | $2.45 \times 10^{-2}$ |
| 15% MZ-CPE | $2.49 \times 10^{-5}$ | $1.38 \times 10^{-4}$ | $1.02 \times 10^{-3}$ | $3.29 \times 10^{-3}$ | $1.70 \times 10^{-2}$ | $2.39 \times 10^{-2}$ |
| 20% MZ-CPE | $1.17 \times 10^{-5}$ | $6.60 \times 10^{-5}$ | $5.60 \times 10^{-4}$ | $2.71 \times 10^{-3}$ | $6.16 \times 10^{-3}$ | $1.20 \times 10^{-2}$ |

**Table S5.** The fitting parameter to obtain the activation energy of the polymer-based solid electrolyte.

| Sample     | Slop [ $E_a/R$ ] (K) | Intercept [ $\log(A)$ ] | $E_a$ (kJ/mol) |
|------------|----------------------|-------------------------|----------------|
| SPE        | -873.21              | 4.5267                  | 7.25987        |
| 5% MZ-CPE  | -560.28              | 3.5953                  | 4.65817        |
| 10% MZ-CPE | -619.11              | 3.5753                  | 5.14728        |
| 15% MZ-CPE | -641.66              | 3.7442                  | 5.33476        |
| 20% MZ-CPE | -700.36              | 3.8388                  | 5.82279        |



**Table S6.** Measured parameter values used for the determination of  $t_{Li^+}$  at 60 °C.

| Sample    | $I_0$ ( $\mu$ A) | $I_s$ ( $\mu$ A) | $R_0$ ( $\Omega$ ) | $R_s$ ( $\Omega$ ) | $\Delta V$ (mV) | $t_{Li^+}$ |
|-----------|------------------|------------------|--------------------|--------------------|-----------------|------------|
| SPE       | 490              | 1.07             | 264                | 890                | 5               | 0.29       |
| 5% CPE    | 566              | 1.25             | 890                | 1544               | 5               | 0.57       |
| 5% MZ-CPE | 696              | 10.38            | 947                | 1120               | 5               | 0.85       |

**Table S7.** Comparison of battery performance for composite polymer electrolytes for Li-metal solid-state batteries.

| Electrolyte                              | $\sigma$ (S/cm)                                                     | Cathode/Anode           | WV (V)  | WT (°C) | SC (mAh/g) | TSC (mA/g) | SLR (AM:CB:BD) | RR (%) (after cycles) | LW (mg/cm <sup>2</sup> ) | Ref.      |
|------------------------------------------|---------------------------------------------------------------------|-------------------------|---------|---------|------------|------------|----------------|-----------------------|--------------------------|-----------|
| PEO-LiTFSI-MIL-53(Al)                    | $3.9 \times 10^{-4}$<br>@75 °C                                      | PANI@C/S-280/Li         | 1.0-3.0 | 80      | 905*       | 1672       | 80:10:10       | 96.7 (60)             | NA                       | [4]       |
| PEO-LiTFSI-HMOP                          | $4.0 \times 10^{-4}$<br>@65 °C                                      | LiFPO <sub>4</sub> /Li  | 2.9-3.8 | 65      | 131        | NA         | 60:10:30       | 91.6 (100)            | 2                        | [5]       |
| PEO-LiClO <sub>4</sub> -SiO <sub>2</sub> | $1.2 \times 10^{-3}$<br>@60 °C                                      | LiFPO <sub>4</sub> /Li  | 2.5-4.1 | 90      | 131        | 170        | 65:15:20       | 80 (80)               | 1.0                      | [6]       |
| PEO-LLZTO                                | $4.5 \times 10^{-4}$<br>@60 °C                                      | LiFPO <sub>4</sub> /Li  | 2.4-4.2 | 60      | 116        | 170        | 80:10:10       | 90 (200)              | NA                       | [7]       |
| PEO-LiTFSI-IL@ZrO <sub>2</sub>           | $4.9 \times 10^{-4}$<br>@50 °C                                      | N-CN <sub>s</sub> /S/Li | 1.8-2.6 | 50      | 1437*      | NA         | 70:10:20       | 68.6 (40)             | 1.18                     | [8]       |
| PEO-LiTFSI-SSZ-13                        | $4.4 \times 10^{-5}$<br>@20 °C<br>$1.91 \times 10^{-3}$<br>@60 °C   | LiFPO <sub>4</sub> /Li  | 2.5-4.0 | 58      | 169        | NA         | 80:10:10       | 92 (160)              | 4.0                      | [9]       |
| PEO-LiTFSI-LLZTO-SN                      | $1.22 \times 10^{-4}$<br>@30 °C                                     | LiFPO <sub>4</sub> /Li  | 2.8-4.0 | 60      | 152        | 150        | 70:10:10       | 95 (50)               | NA                       | [10]      |
| PEO-LiPCSI                               | $8.32 \times 10^{-5}$<br>@65 °C                                     | LiFPO <sub>4</sub> /Li  | NA      | 60      | 141        | NA         | NA             | 85 (80)               | NA                       | [11]      |
| PEO-LiTFSI-M-SSZ-13                      | $6.16 \times 10^{-4}$<br>@30 °C<br>$5.34 \times 10^{-2}$<br>@ 70 °C | LiFPO <sub>4</sub> /Li  | 2.6-4.3 | 60      | 154        | 170        | 90:05:05       | 94.0 (80)             | 2.2                      | This work |

\*Lithium-Sulphur battery

WV = working voltage, WT = working temperature, SC = specific capacity, TSC = Theoretical specific capacity, RR = retention rate, LW = loading weight, SLR = slurry ratio, AM = active materials, CB = carbon black, and BD = binder

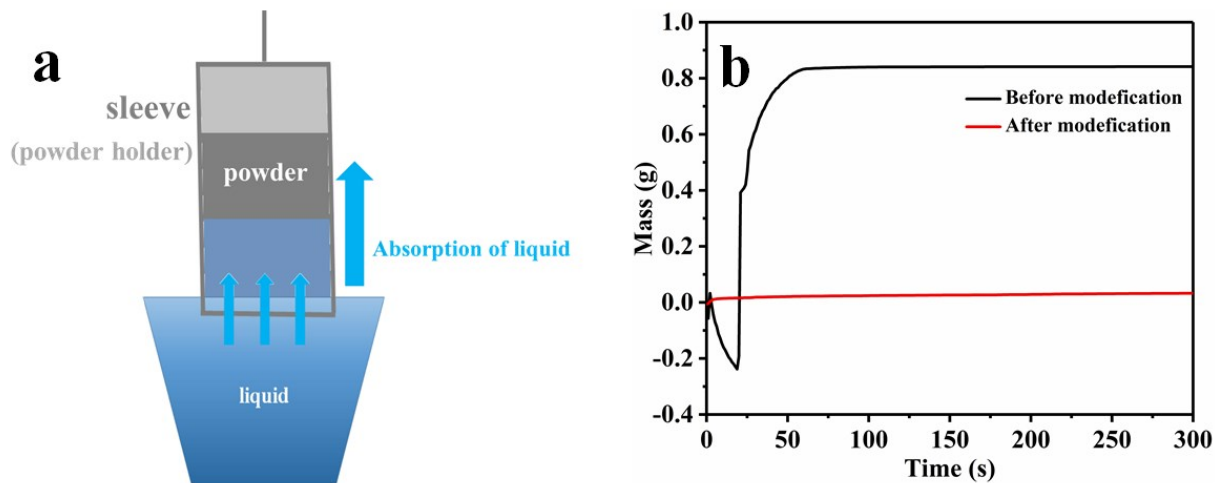

**Fig. S1.** (a) The schematic diagram of wettability analyser using force tensiometer and (b) the mass vs time curve for the zeolite before and after surface modification with BYK-SILCLEAN 3700.

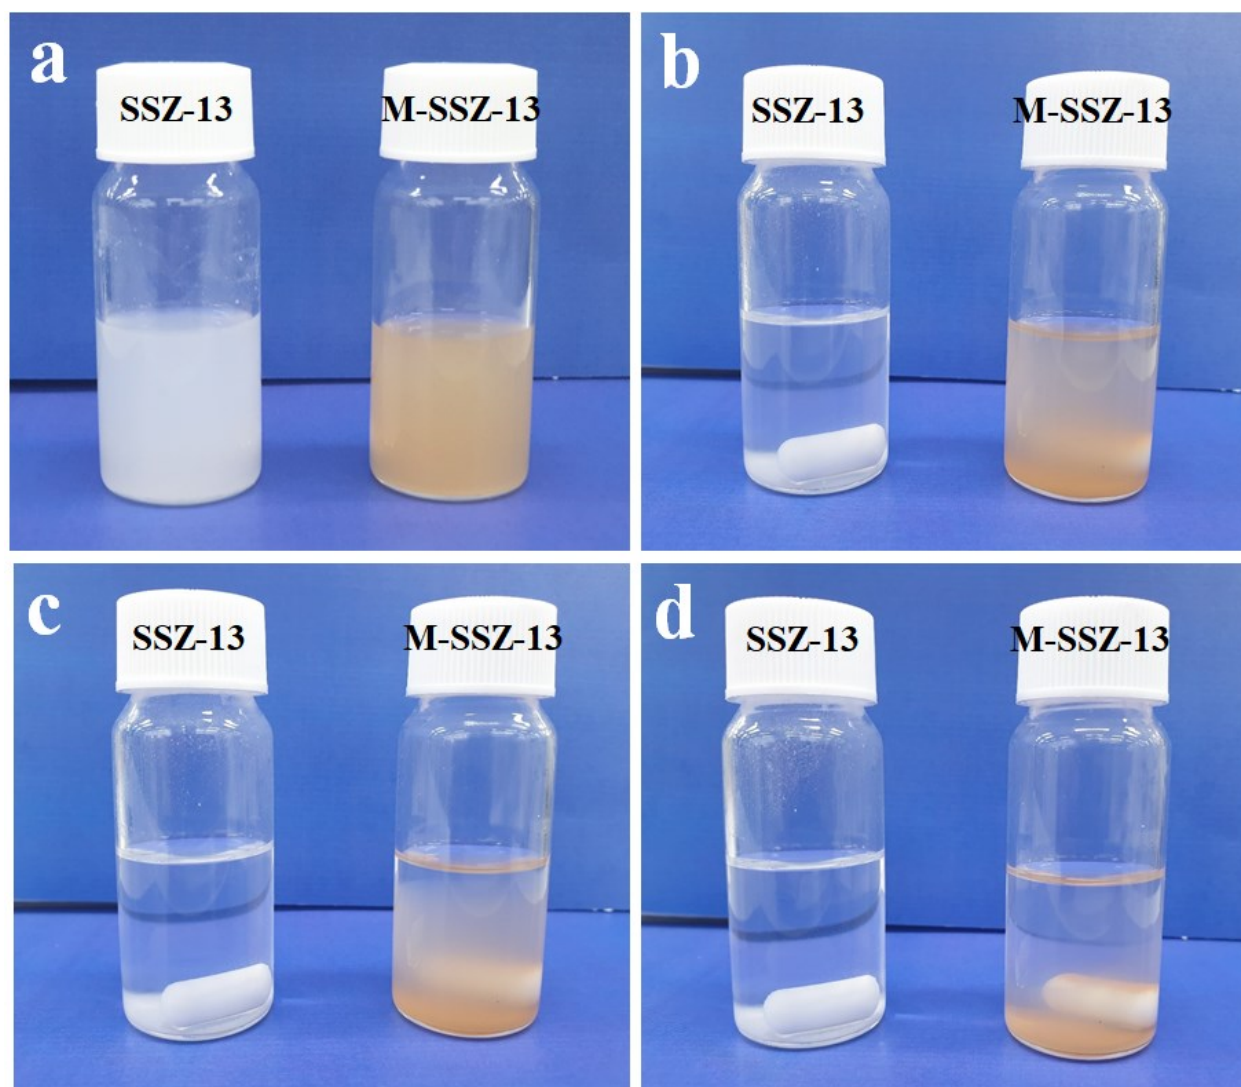

**Fig. S2.** Dispersion of SSZ-13 zeolite and M-SSZ-13 in ACN, (a) Right after 24 h stirring, (b) dispersion stability after 15 min, (c) dispersion stability after 1 h, and (d) dispersion stability after 3 h.

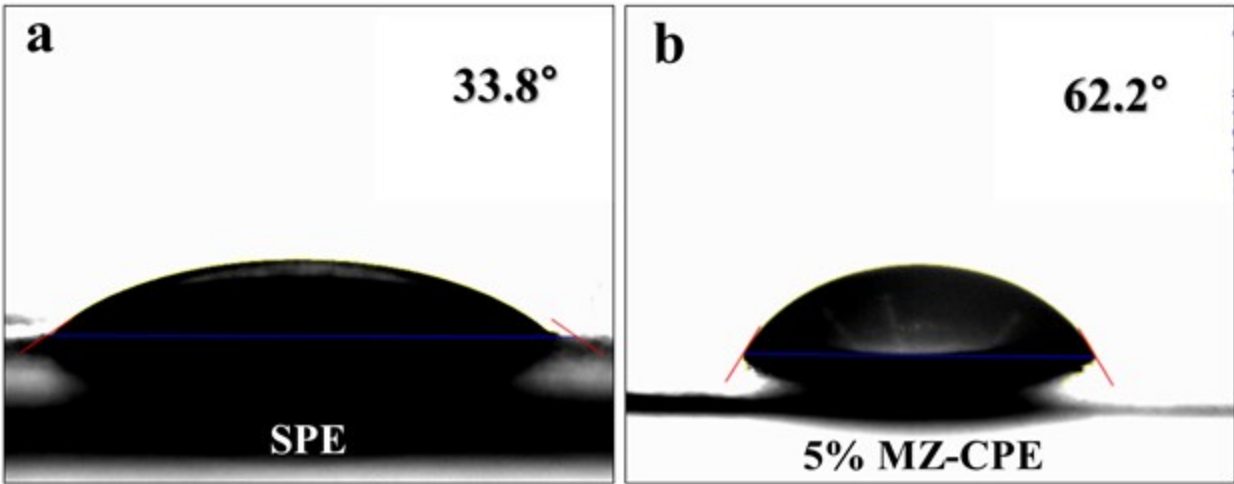

**Fig. S3.** Contact angle images of (a) SPE and (b) 5% MZ-CPE using deionized water droplet.

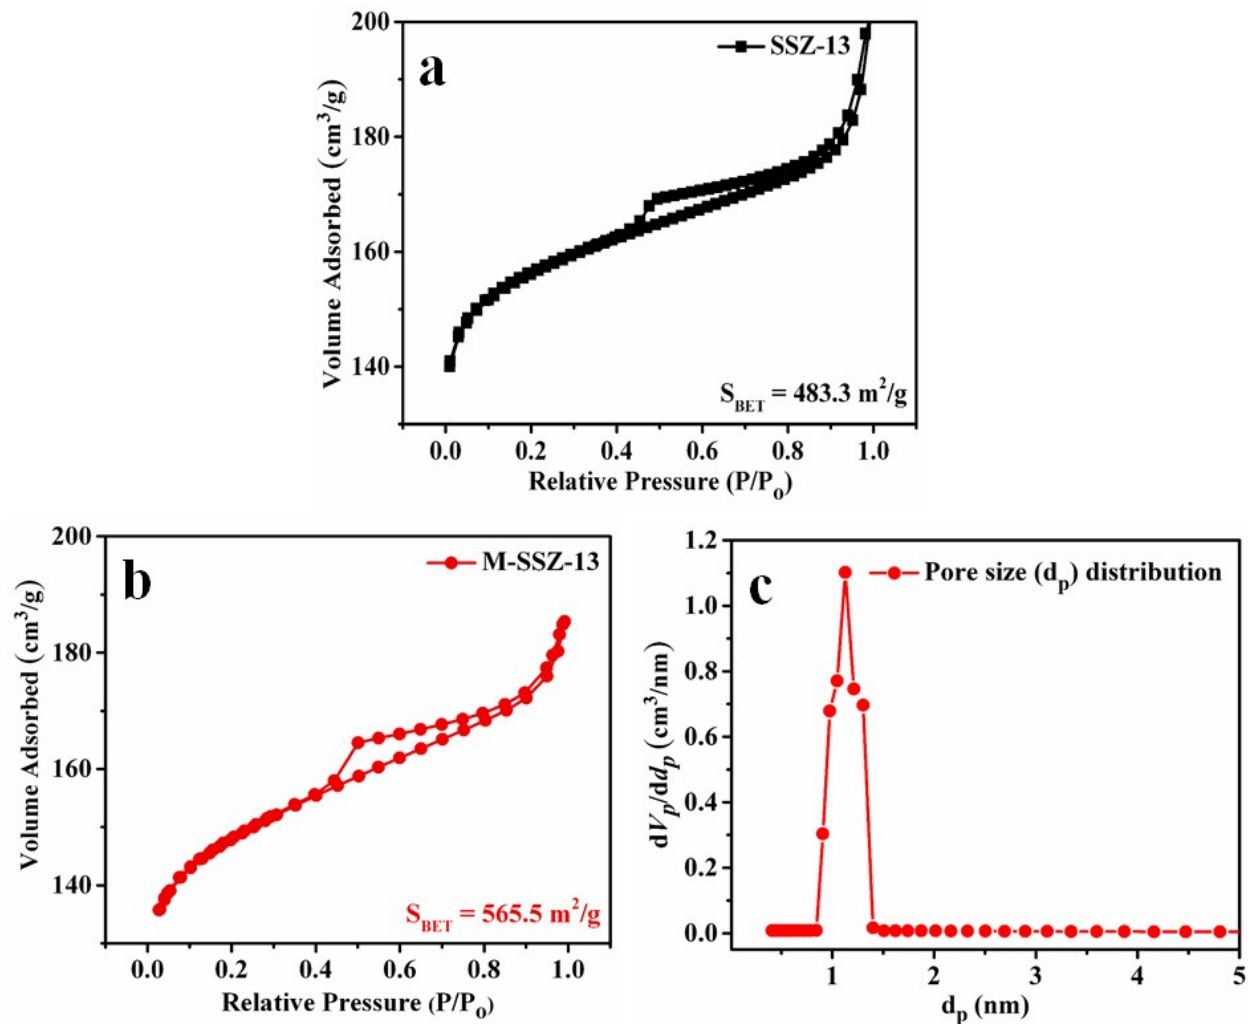

**Fig. S4.** Nitrogen adsorption-desorption isotherm of (a) SSZ-13 zeolite, (b) M-SSZ-13 zeolite and (c) BJH pore size ( $d_p$ ) distribution curve of M-SSZ-13 Zeolite.

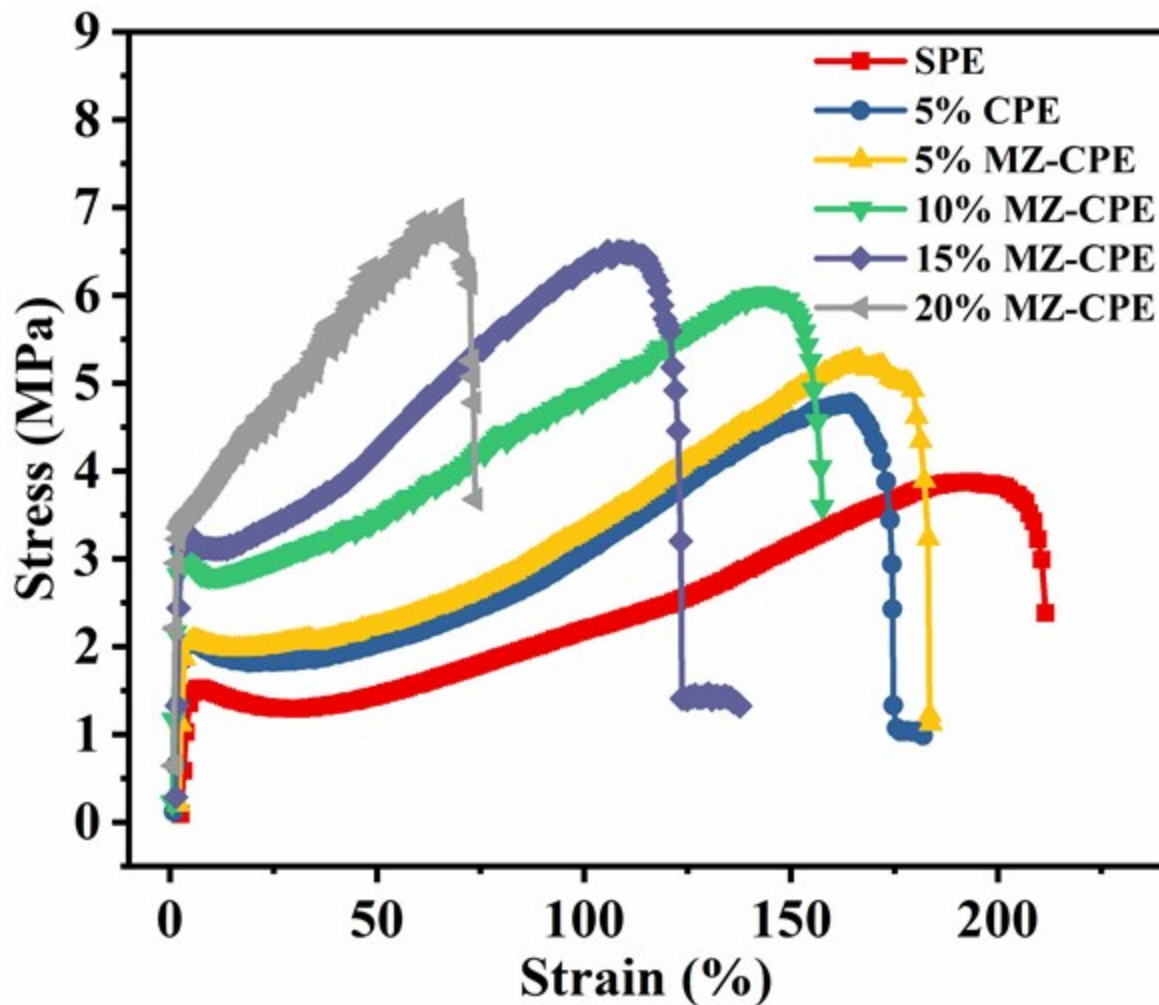

**Fig. S5.** Stress-strain curves of SPE, 5% CPE, 5% MZ-CPE, 10% MZ-CPE, 15% MZ-CPE, and 20% MZ-CPE solid electrolytes.

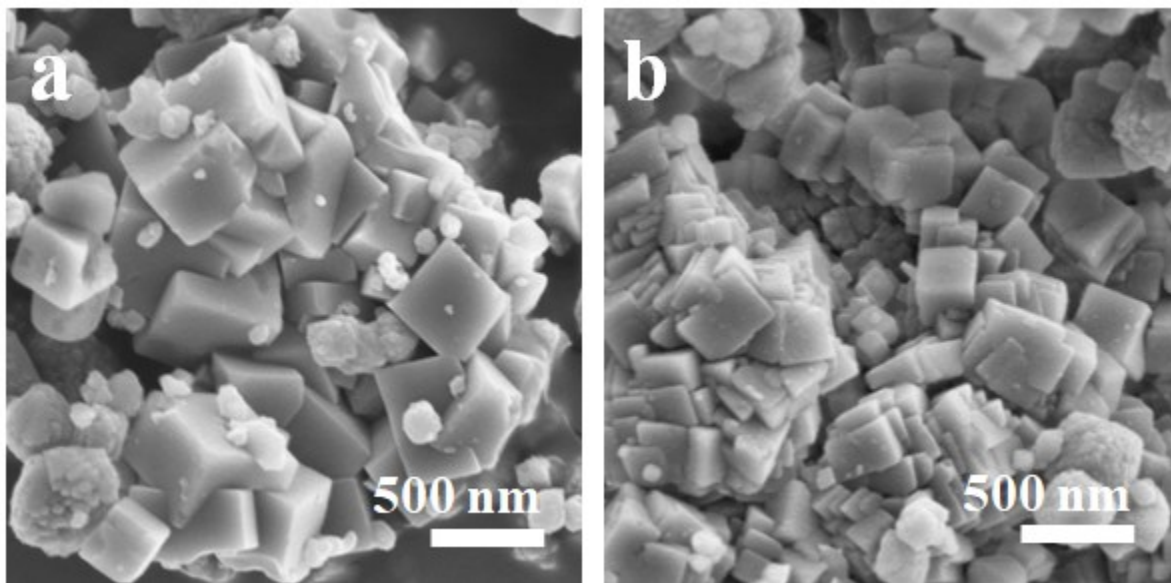

**Fig. S6.** FE-SEM images of (a) SSZ-13 and (b) M-SSZ-13 zeolites.



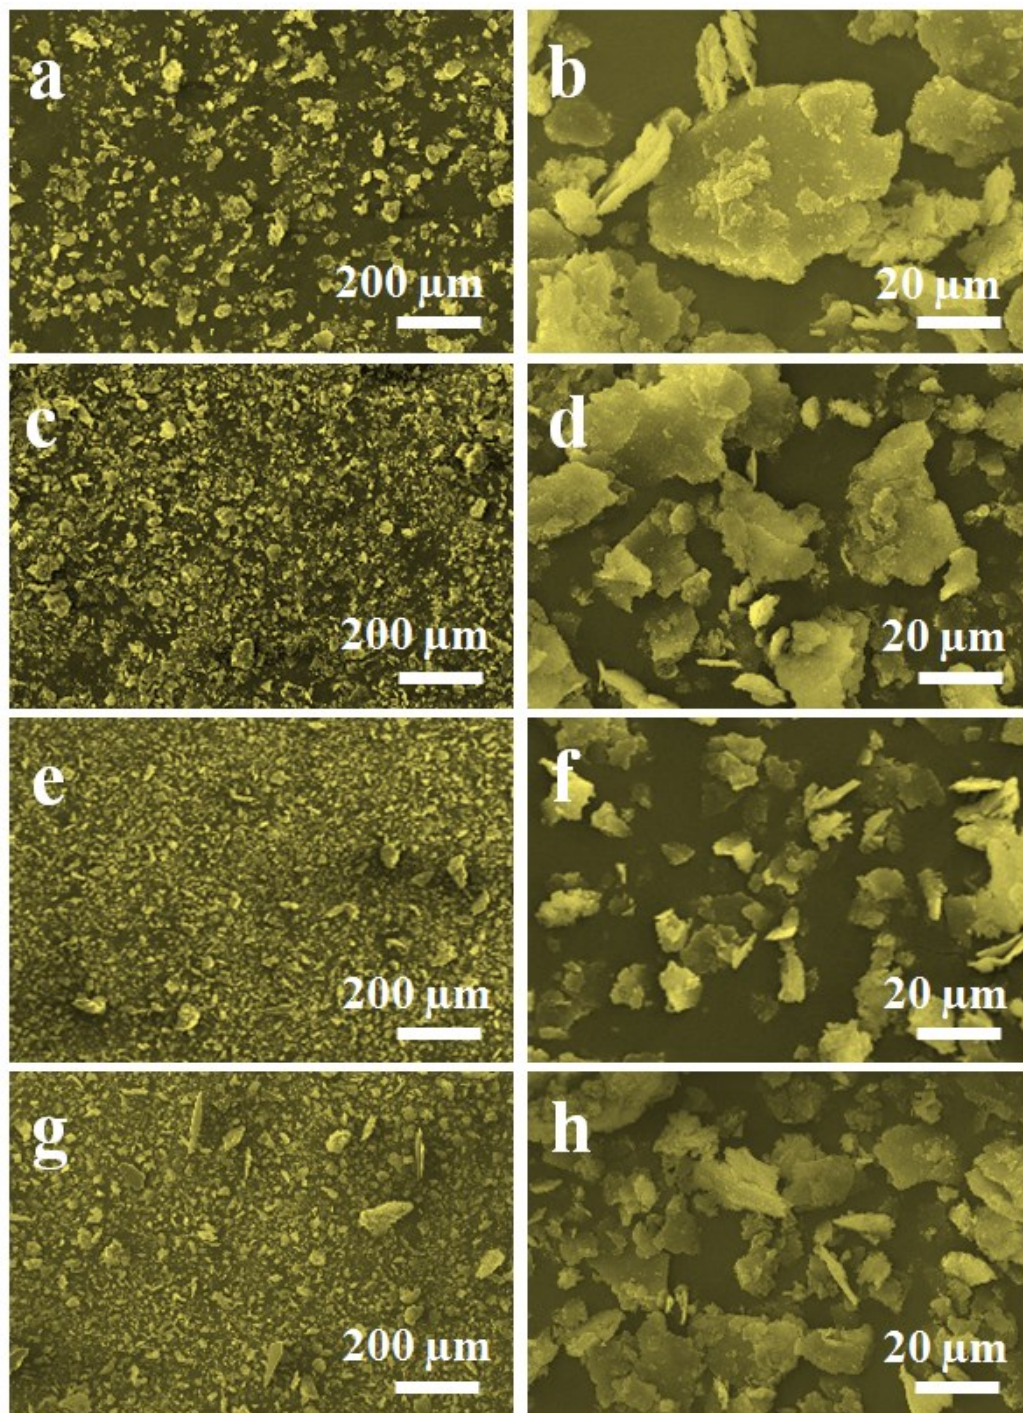

**Fig. S7.** SEM images of M-SSZ-13 with ACN ball-milled for various time duration, (a, b) 48 h, (c, d) 96 h, (e, f) 144 h, and (g, h) 192 h.

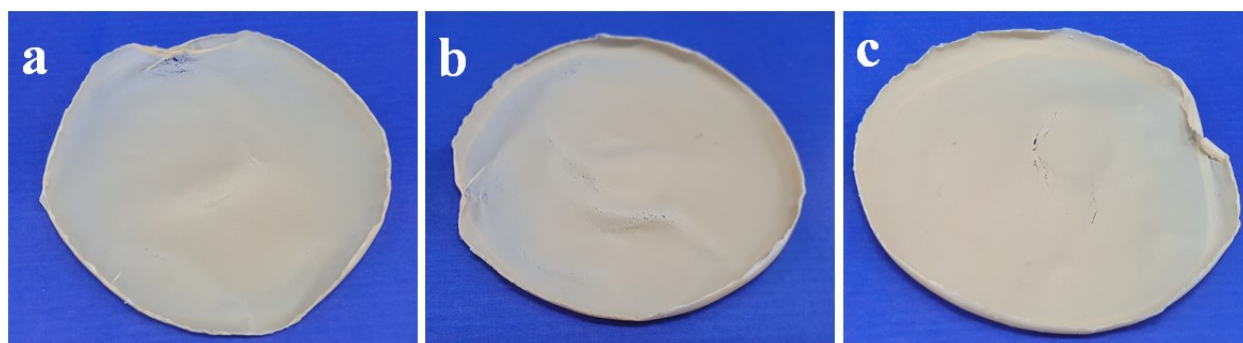

**Fig. S8.** Optical images of 5% MZ-CPE for ball-milling duration of (a) after 96 h, (b) after 144 h and (c) after 192 h.

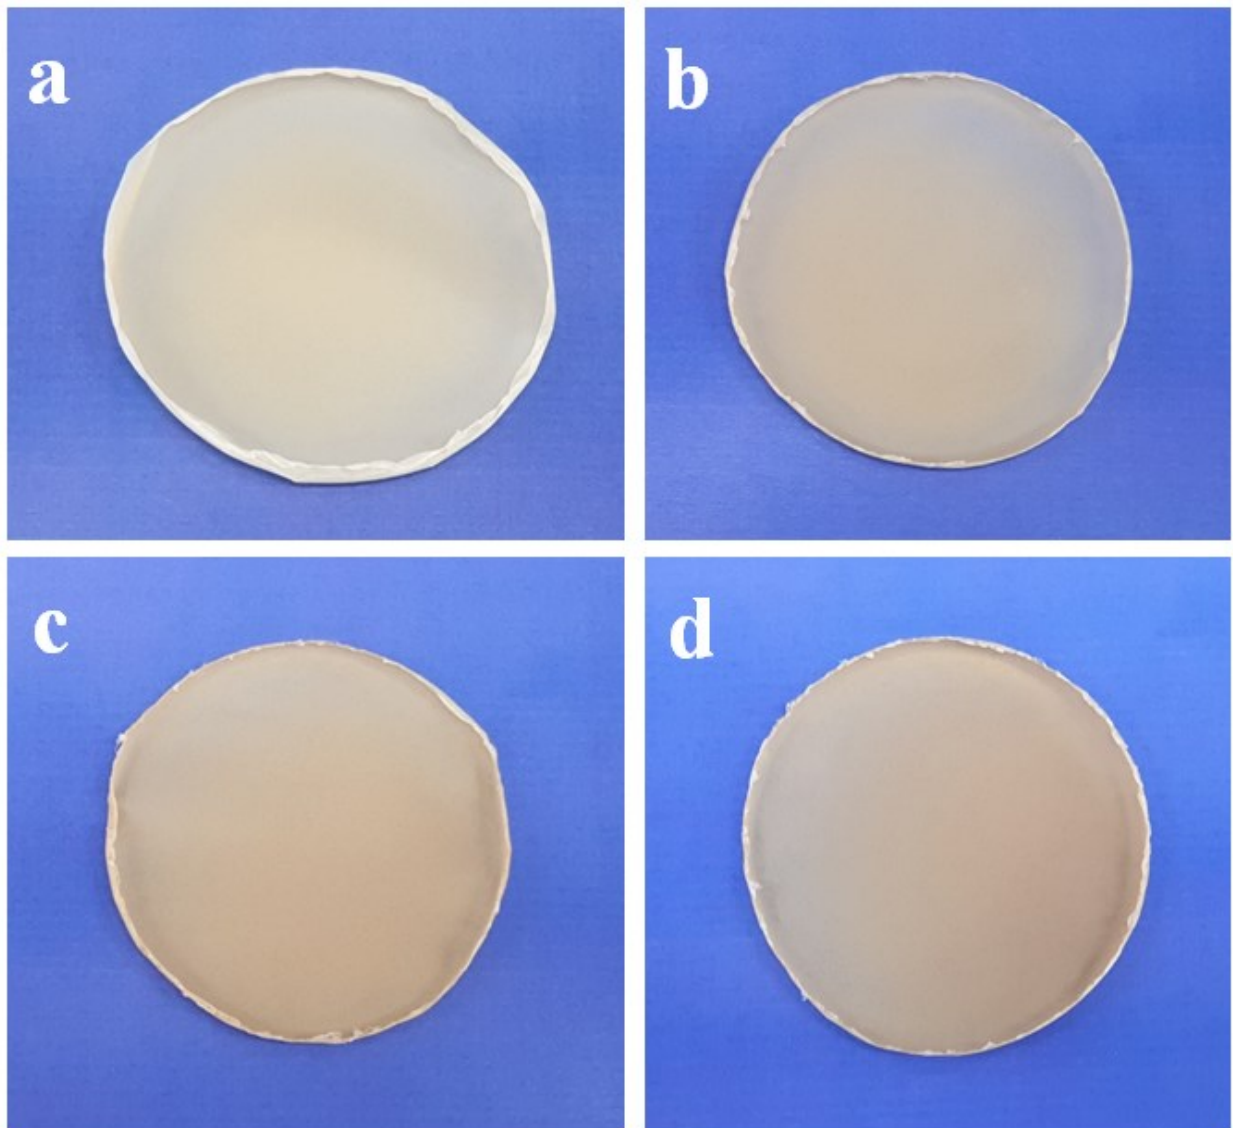

**Fig. S9.** Optical images of MZ-CPE films for various contents of M-SSZ-13 after 48 h of ball-milling (a) 5% MZ-CPE, (b) 10% MZ-CPE, (c) 15% MZ-CPE and (d) 20% MZ-CPE.

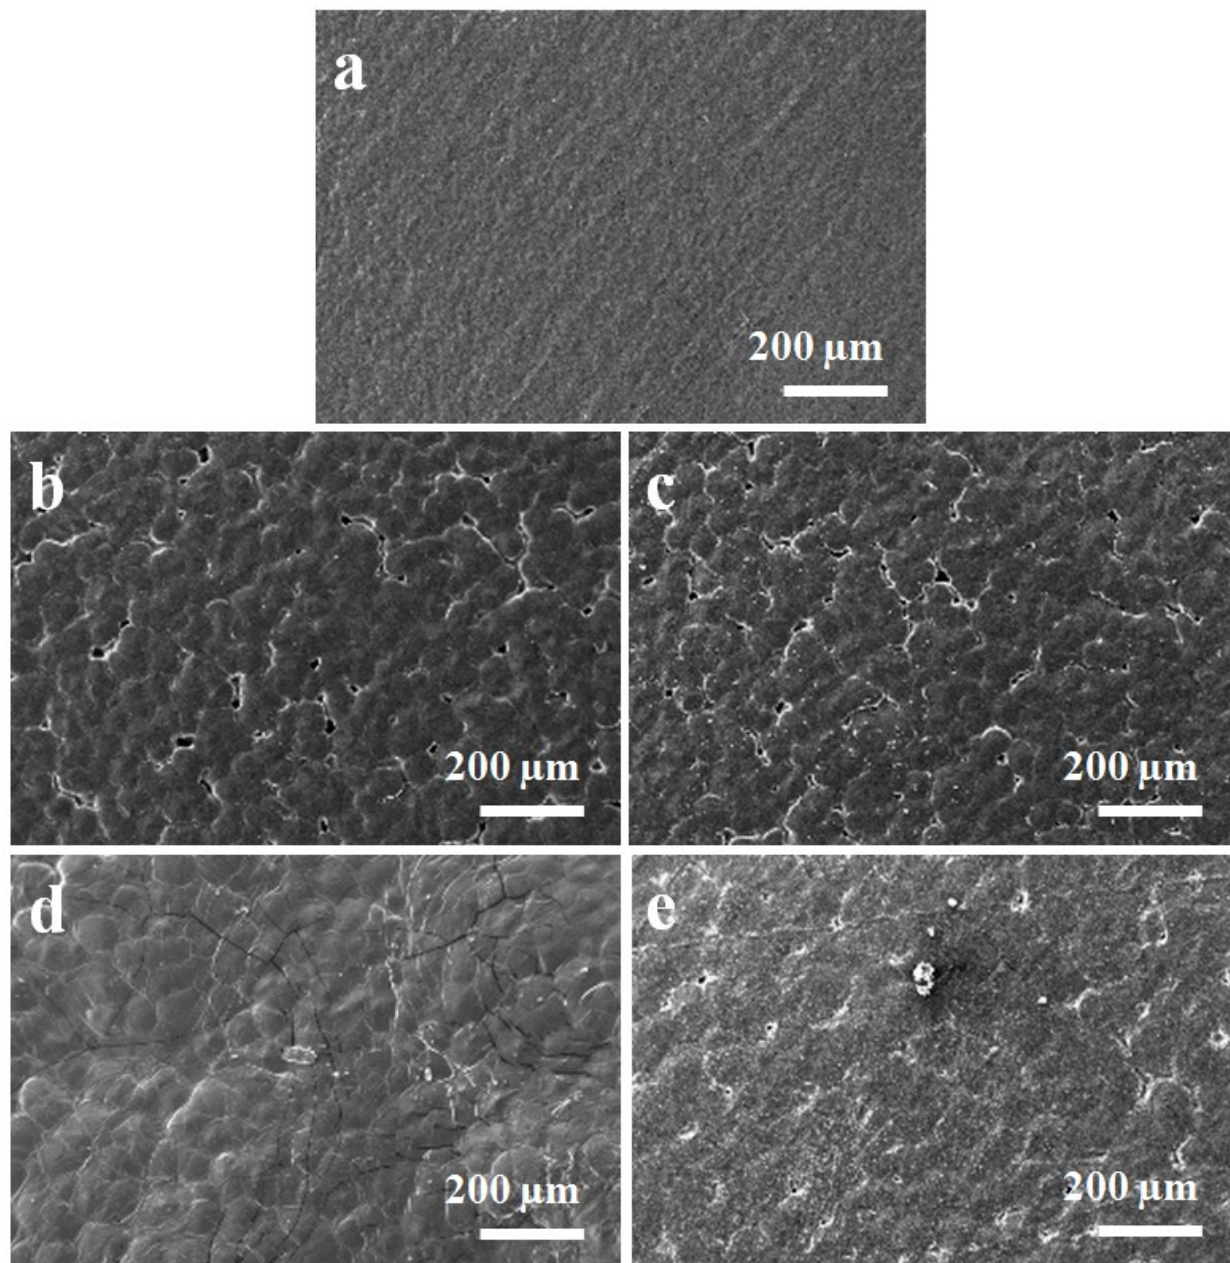

**Fig. S10.** SEM images of (a) SPE, (b) 5% MZ-CPEs, (c) 10% MZ-CPE, (d) 15% MZ-CPE, and (e) 20% MZ-CPE solid electrolytes.

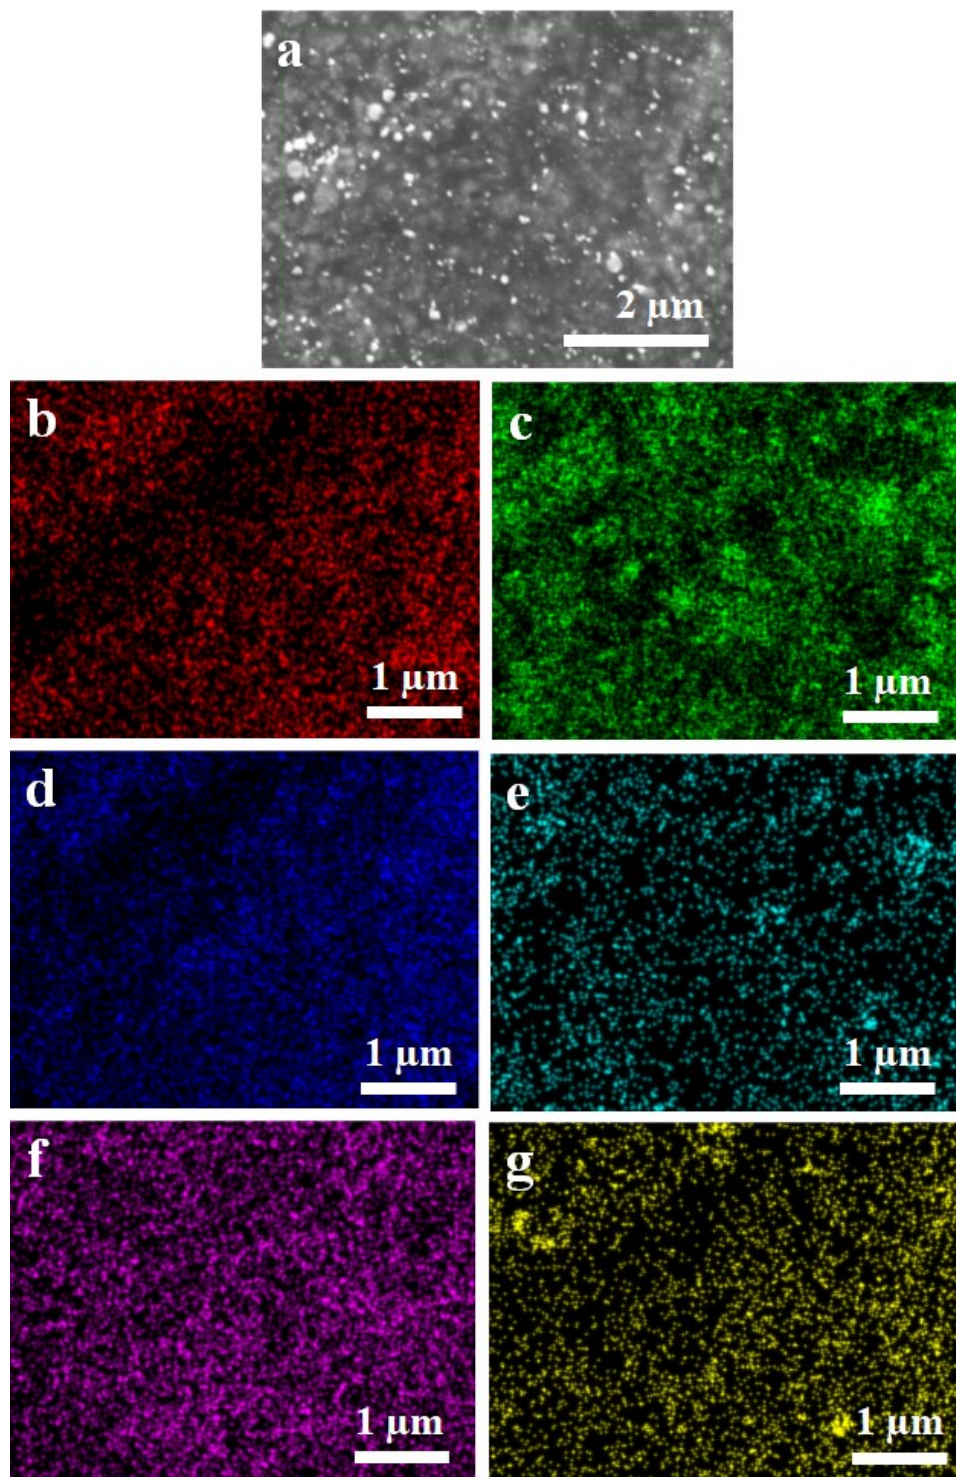

**Fig. S11.** FE-SEM image of (a) 5% MZ-CPE, and EDX mapping of 5% MZ-CPE for (b) C, (c) Si, (d) O, (e) Al, (f) S, and (g) F elements.

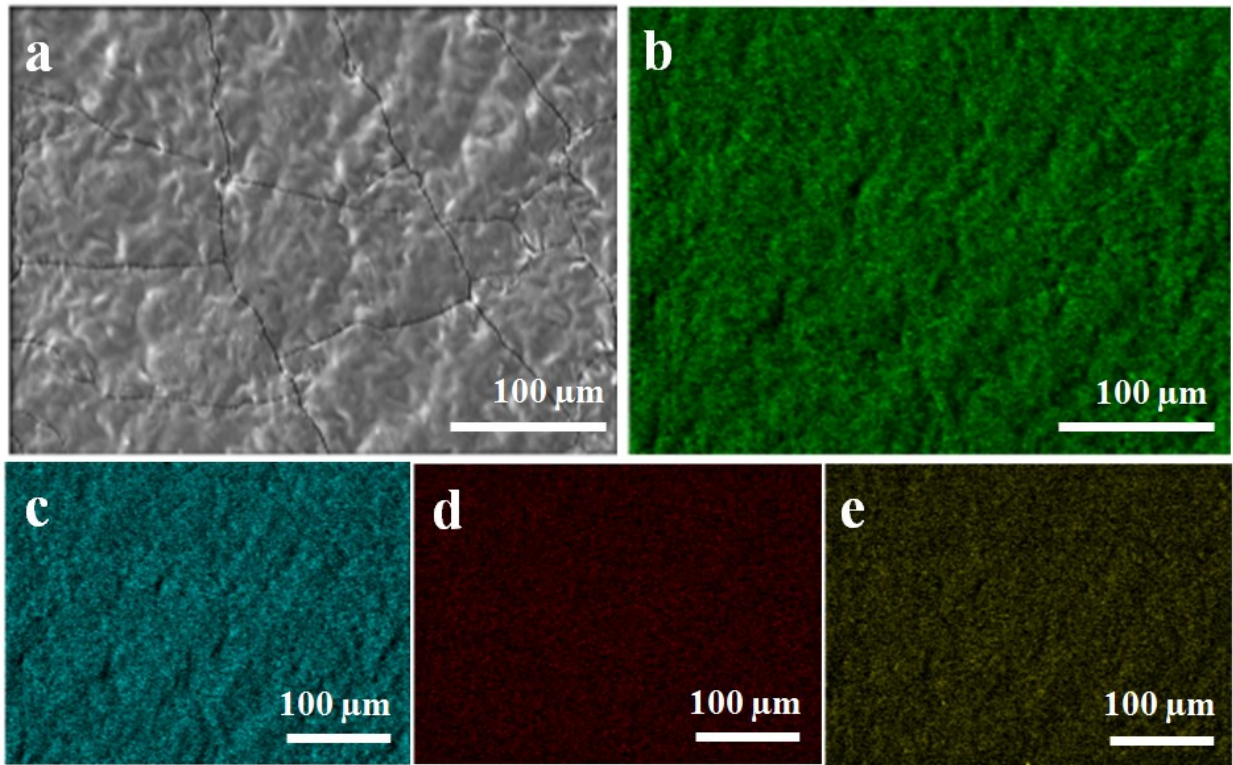

**Fig. S12.** SEM image (a) SPE, and EDX mapping of SPE for (b) C, (c) O, (d) S, and (e) F elements.

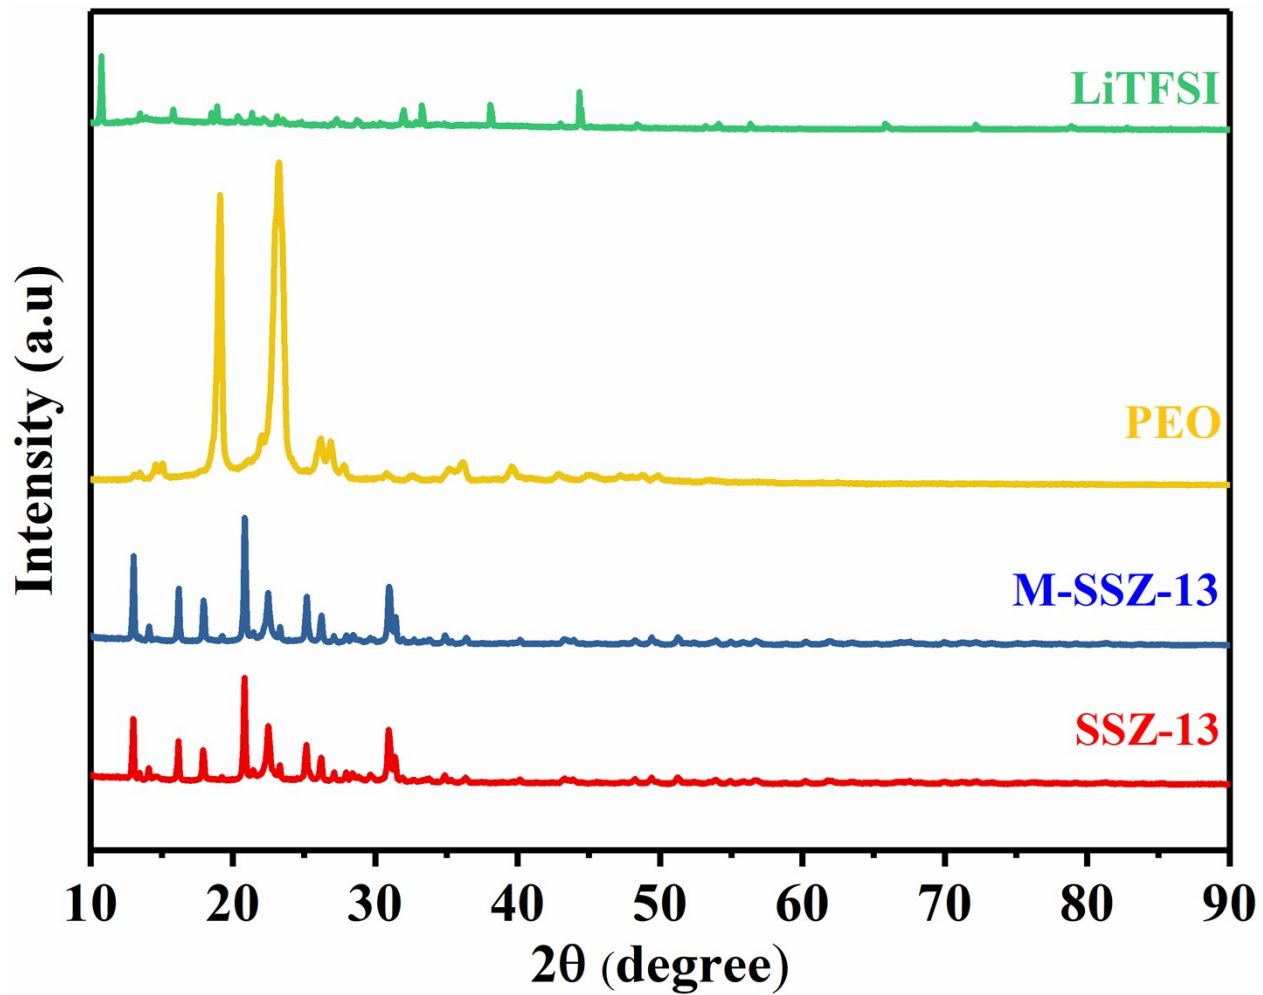

Fig. S13. XRD patterns of SSZ-13, M-SSZ-13, PEO and LiTFSI from  $10^{\circ}$  to  $90^{\circ}$ .

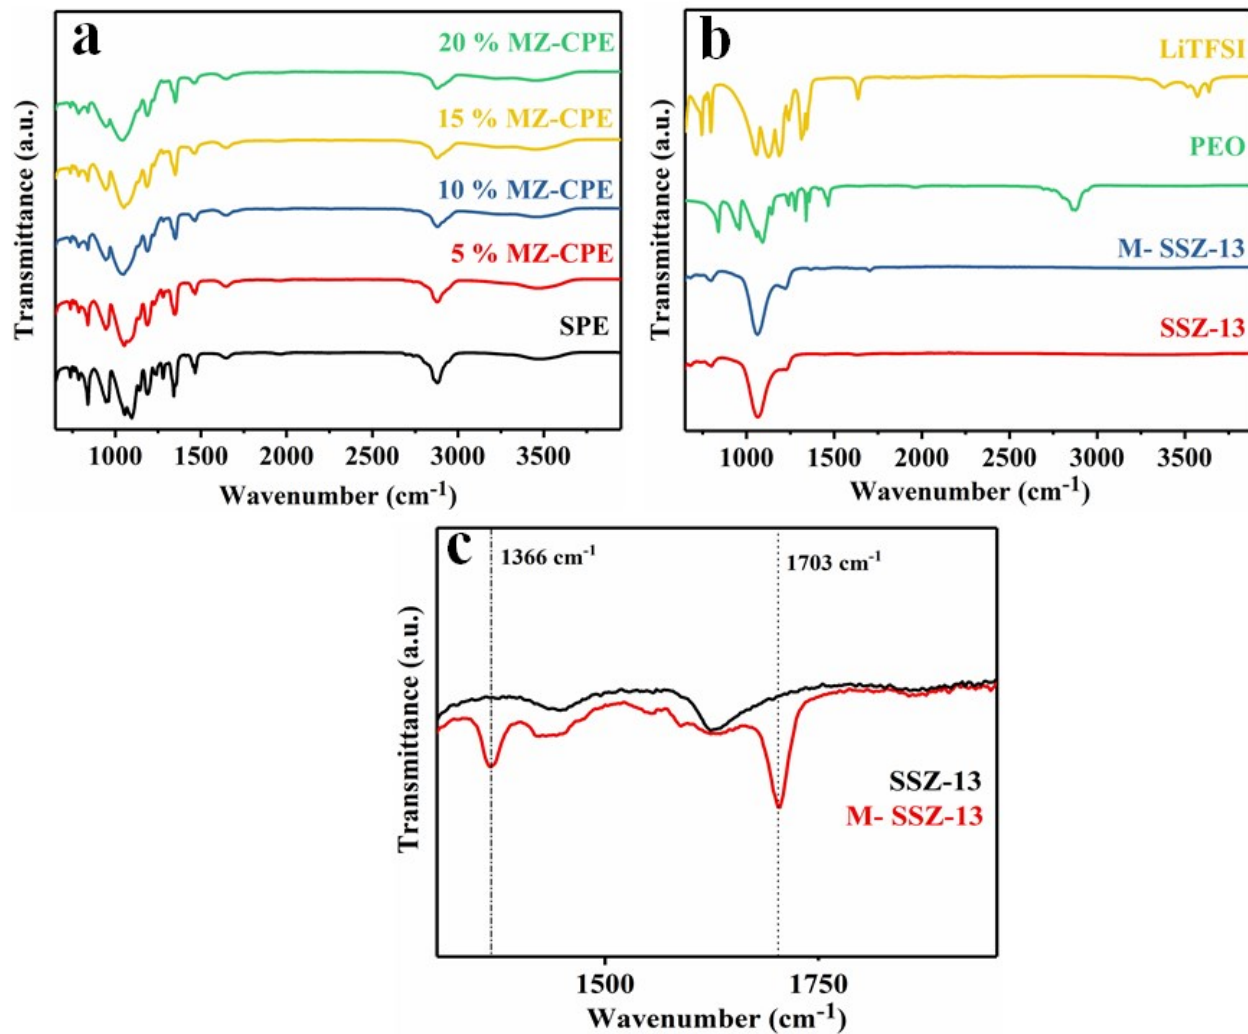

**Fig. S14.** (a) FTIR spectra of SPE, 5% MZ-CPE, 10% MZ-CPE, 15% MZ-CPE and 20% MZ-CPE between 650–3900 cm<sup>-1</sup>, (b) FTIR spectra of SSZ-13, M-SSZ-13, PEO and LiTFSI between 650–3900 cm<sup>-1</sup>, and (c) Magnified FTIR spectra of SSZ-13 and M-SSZ-13 in the range of 1303–1959 cm<sup>-1</sup>.



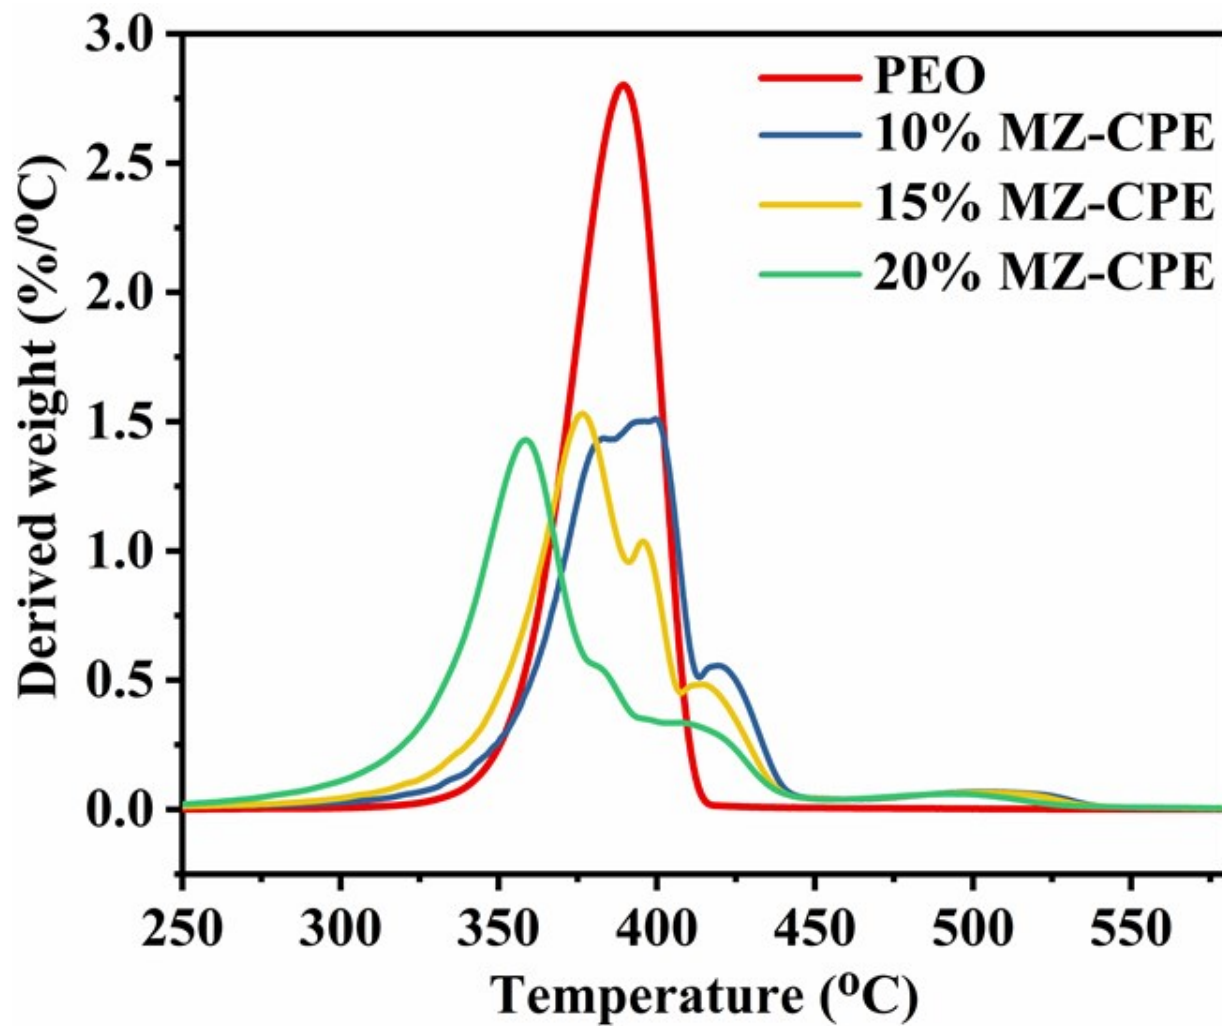

Fig. S15. Derived weight vs. temperature curves for PEO, 10% MZ-CPE, 15% MZ-CPE and 20% MZ-CPE in the temperature range of 250 - 600 °C.

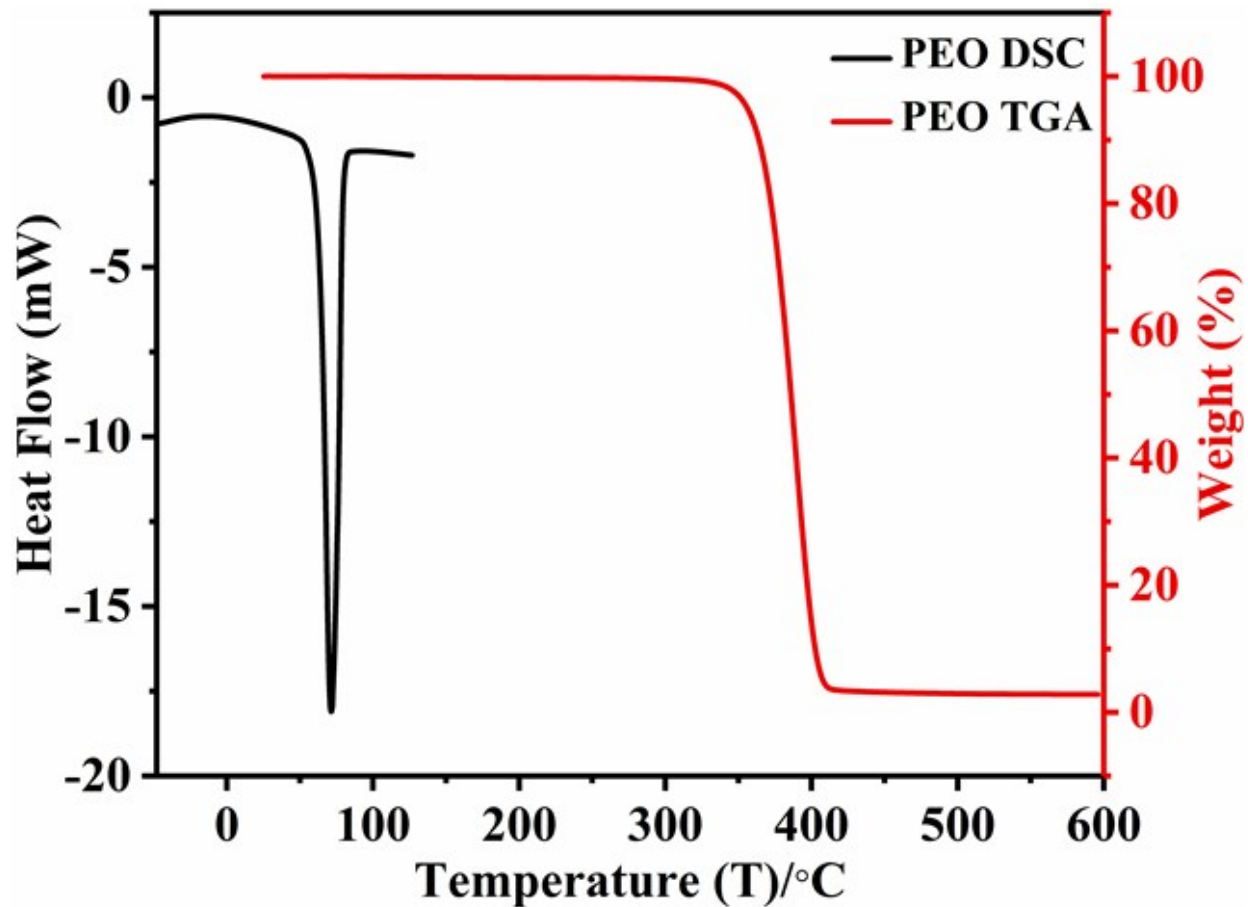

**Fig. S16.** DSC and TGA curves of PEO in the temperature ranges of -50 °C – 150 °C and 25 – 600 °C, respectively. All analysis is made under the flow of N<sub>2</sub> along with heating ramp-rate of 10 °C/min.

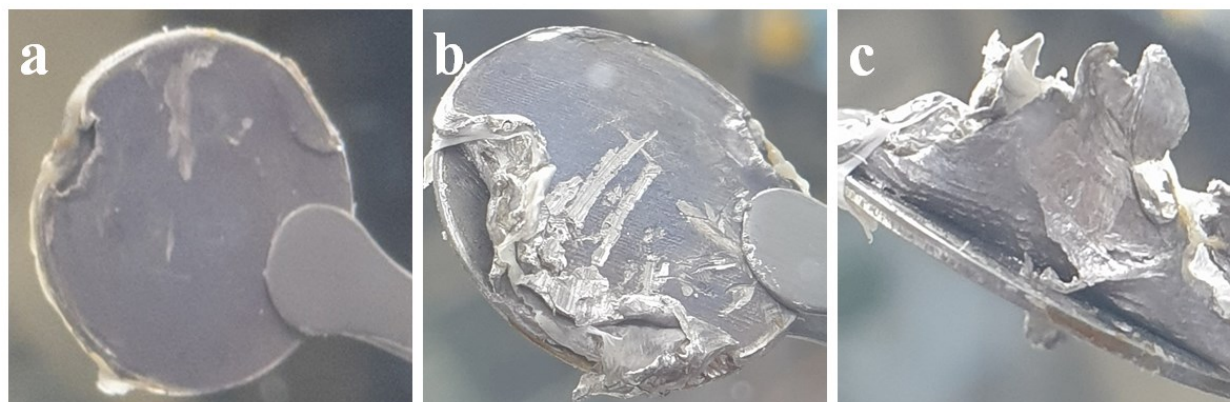

**Fig. S17. (a-c)** Optical images of symmetrical coin cell [Li|5% MZ-CPE|Li] after the activation @70 °C for 2 h. The 5% MZ-CPE very strongly attached with Li-metal.

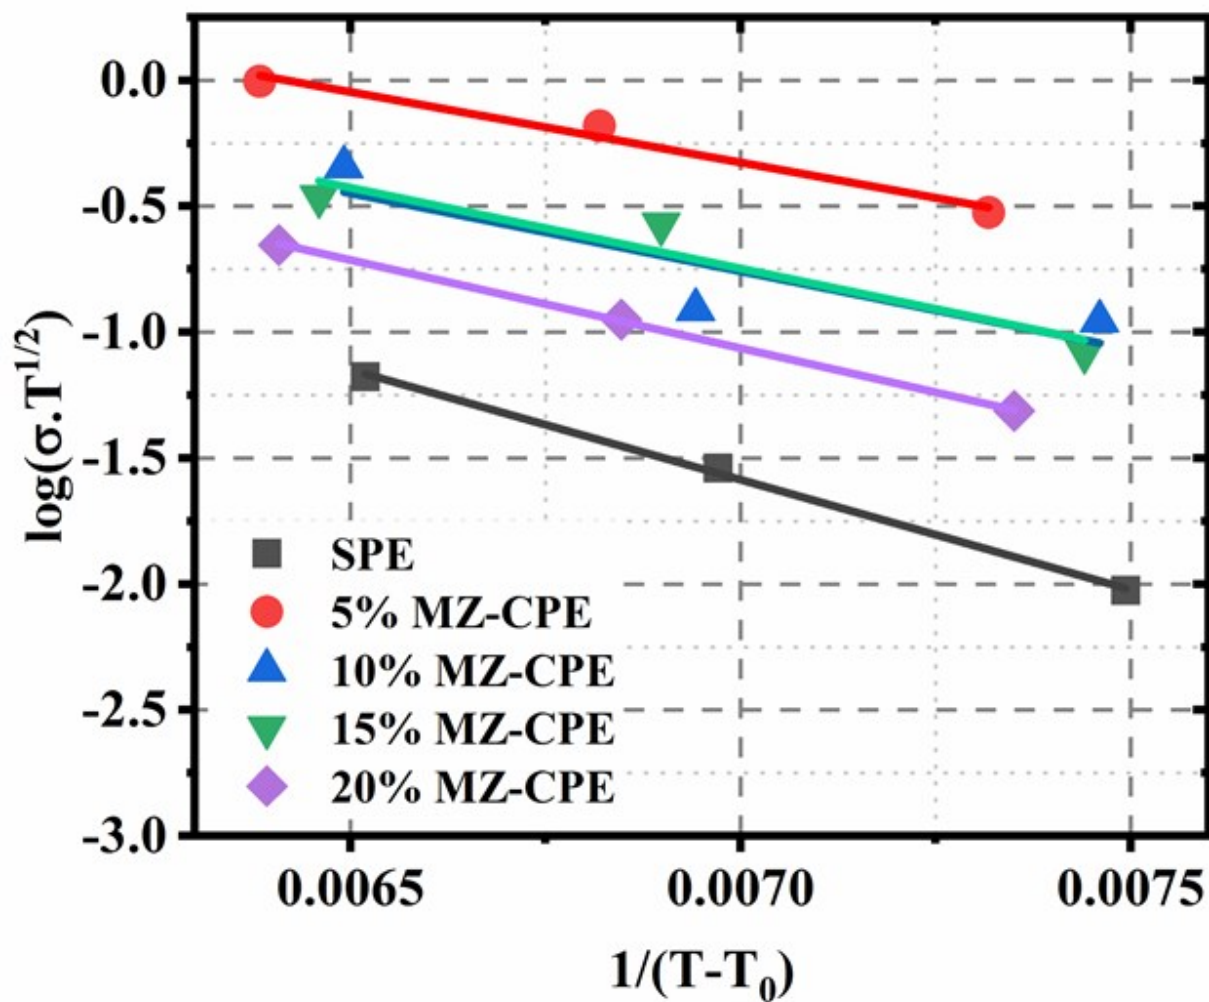

**Fig. S18.** VTF fitting results [between  $\log(\sigma \cdot T^{1/2})$  vs.  $\frac{1}{(T-T_0)}$ ] for determination of the activation energy of SPE and MZ-CPEs (5%, 10%, 15%, and 20%).

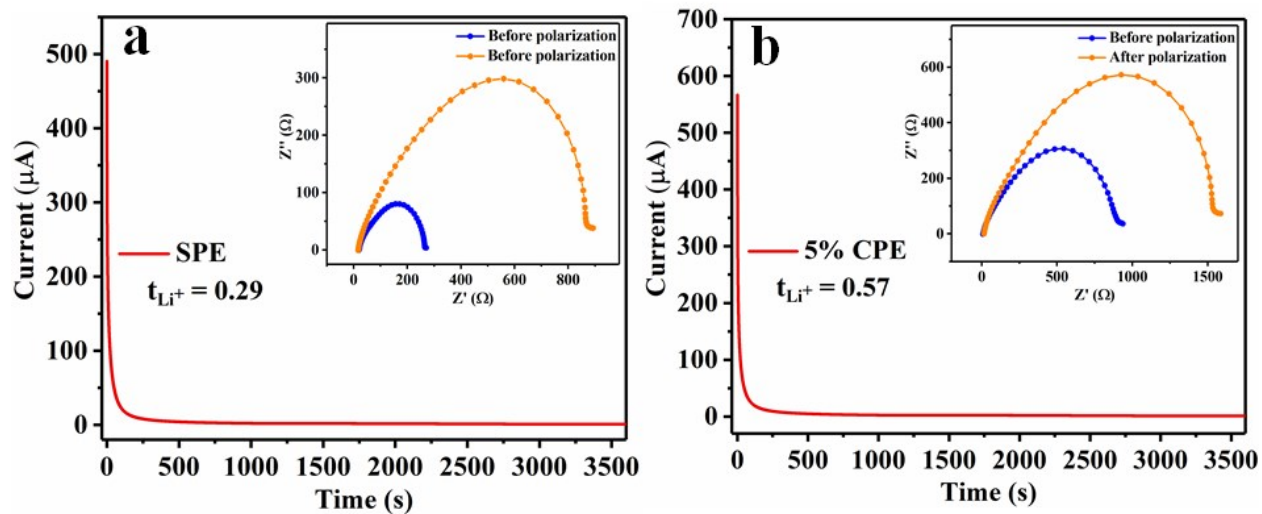

**Fig. S19.** Current-time profile of (a) SPE for Li symmetric batteries [Li|SPE|Li] @60 °C (Inset: Nyquist plots before and after polarization) and (b) 5% CPE for Li symmetric batteries [Li|5% CPE|Li] @60 °C (Inset: Nyquist plots before and after polarization).

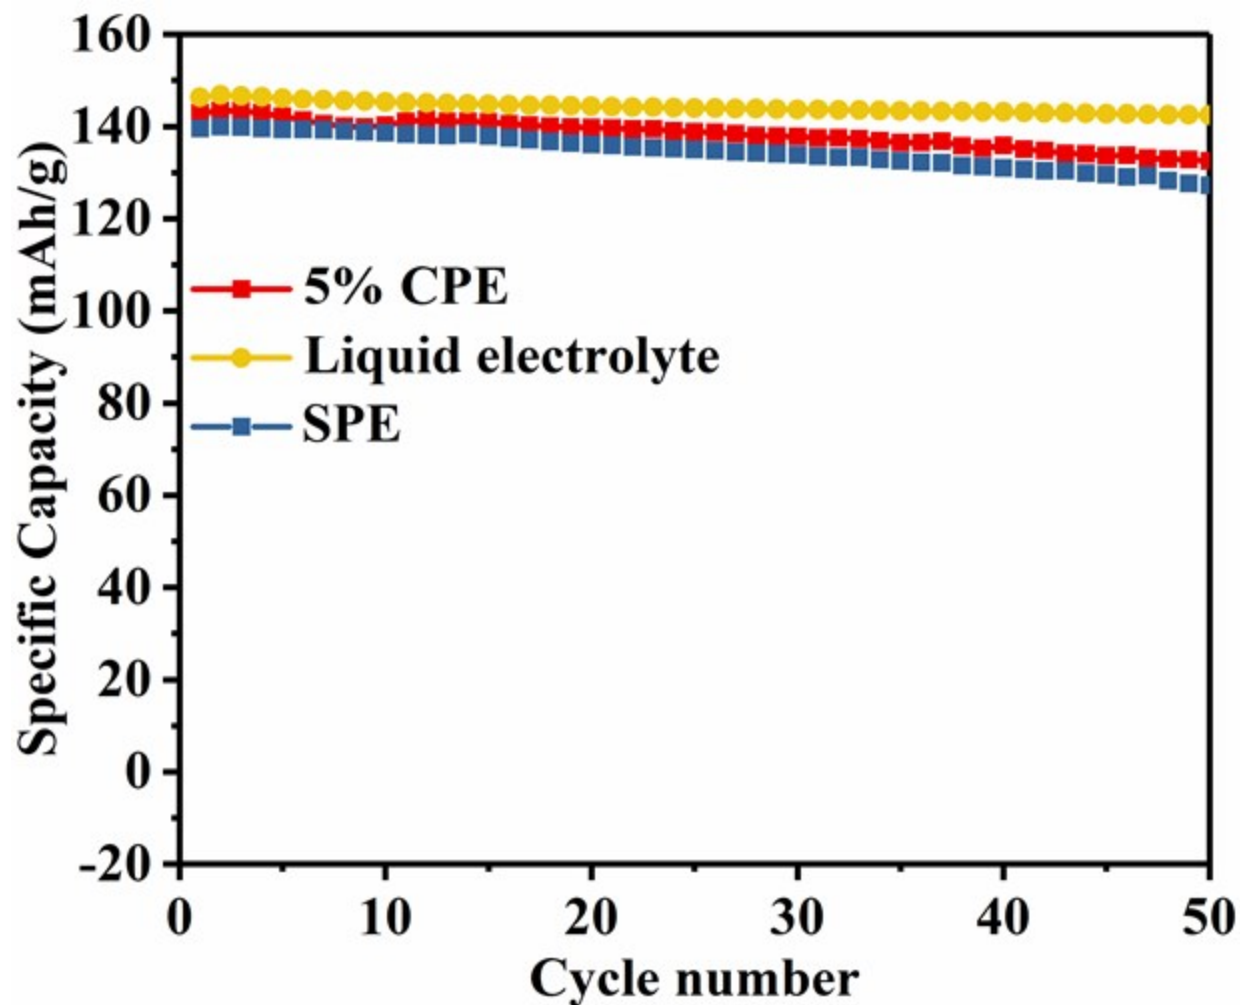

**Fig. S20.** Comparison of cycling performance of 5% CPE with the cell structure of [Li|5% CPE|LFP] (@60 °C), liquid electrolyte with cell structure of [Li|liquid electrolyte|LFP] (@30 °C) and SPE with cell structure of [Li|SPE|LFP] (@60 °C) at the discharge current density of 0.1 C.

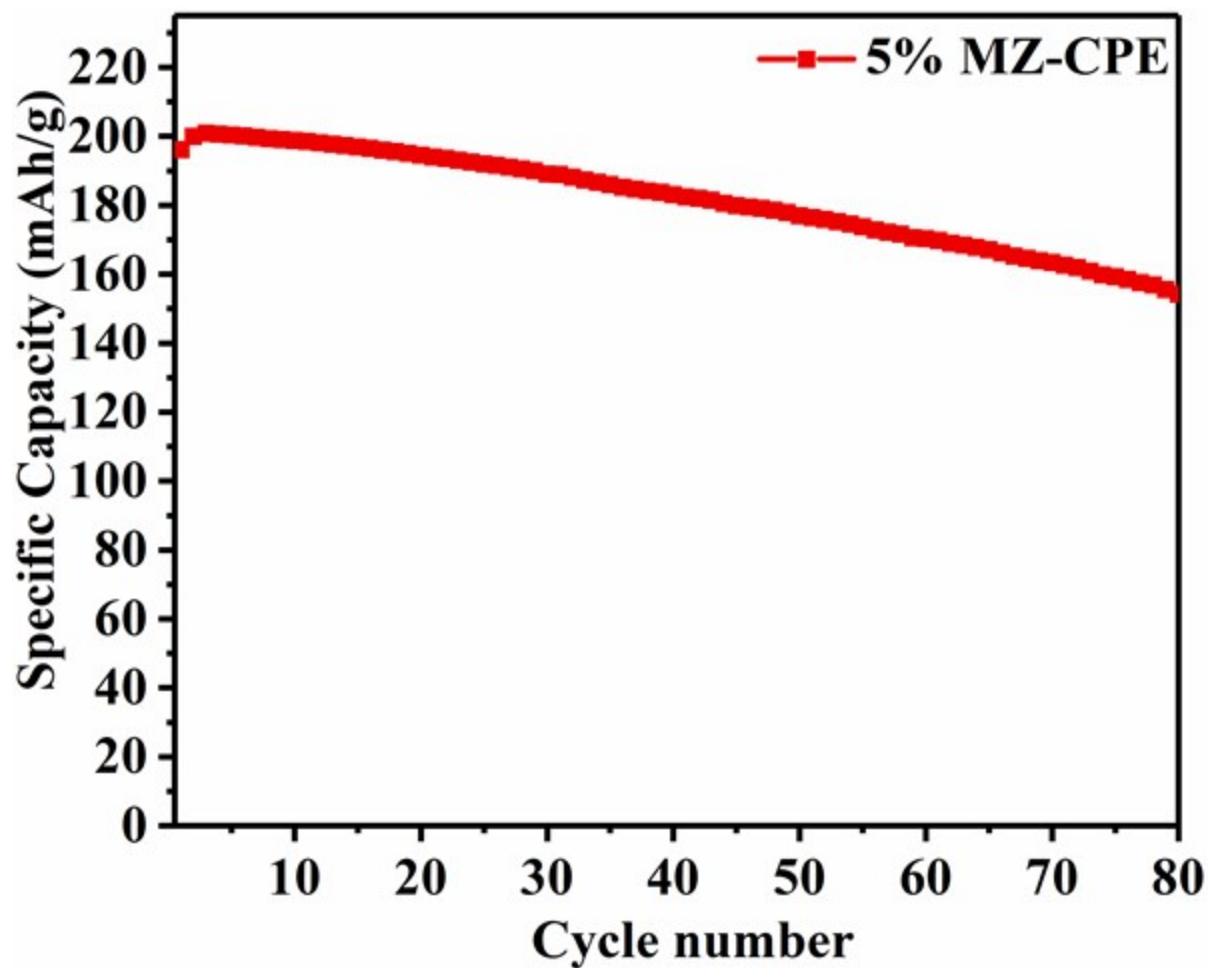

**Fig. S21.** Cycling performance of 5% MZ-CPE with cell structure of [Li|5% MZ-CPE|NCA] at the discharge current density of 0.1 C (@60 °C).

## References

- [1] Shalu, V. K. Singh and R. K. Singh, *J. Mater. Chem. C*, 2015, **3**, 7305–7318.
- [2] S. K. Chaurasia, A. L. Saroj, Shalu, V. K. Singh, A. K. Tripathi, A. K. Gupta, Y. L. Verma and R. K. Singh, *AIP Adv*, 2015, **3**, 077178.
- [3] D. M. Pesko, Y. Jung, A. L. Hasan, M. A. Webb, G. W. Coates, T. F. Miller and N. P. Balsara, *Solid State Ionics*, 2016, 289, 118–124.
- [4] C. Zhang, Y. Lin and J. Liu, *J. Mater. Chem. A*, 2015, **3**, 10760–10766.
- [5] W. Zhou, H. Gao and J. B. Goodenough, *Adv. Energy Mater*, 2016, **6**, 1501802–1501810.
- [6] D. Lin, W. Liu, Y. Liu, H. R. Lee, P. C. Hsu, K. Liu and Y. Cui, *Nano Lett.*, 2016, **16**, 459–465.
- [7] J. Zhang, N. Zhao, M. Zhang, Y. Li, P. K. Chu, X. Guo, Z. Di, X. Wang and H. Li, *Nano Energy*, 2016, **28**, 447–454.
- [8] O. Sheng, C. Jin, J. Luo, H. Yuan, C. Fang, H. Huang, Y. Gan, J. Zhang, Y. Xia, C. Liang, W. Zhang and X. Tao, *J. Mater. Chem. A*, 2017, **5**, 12934–12942.
- [9] W. Li, S. Zhang, B. Wang, S. Gu, D. Xu, J. Wang, C. Chen and Z. Wen, *ACS Appl. Mater. Interfaces*, 2018, **10**, 23874–23882.
- [10] W. Zha, F. Chen, D. Yang, Q. Shen and L. Zhang, *J. Power Sources*, 2018, **397**, 87–94.
- [11] H. Yuan, J. Luan, Z. Yang, J. Zhang, Y. Wu, Z. Lu and H. Liu, *ACS Appl. Mater. Interfaces*, 2020, **12**, 7249–7256.
